# Supplementary material
Source: PubMed Central journal article supplement (PMC11072876)

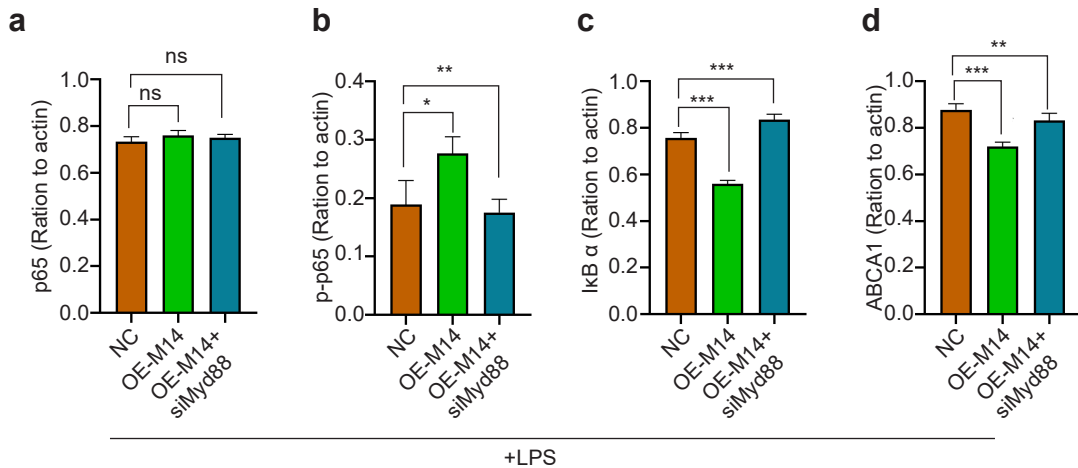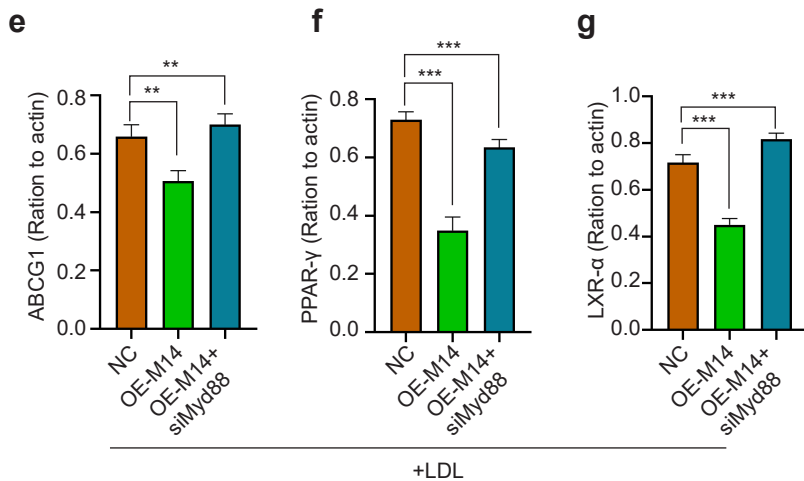

Supplement: 18_2022_4331_MOESM9_ESM.pdf [file 18_2022_4331_MOESM9_ESM.pdf]
